# Supplementary material for: Consistency analysis of consciousness index and bispectral index in monitoring the depth of sevoflurane anesthesia in laparoscopic surgery
Source: PeerJ. 2024 Feb 14;12:e16848. doi: 10.7717/peerj.16848 (PMC10874172; doi:10.7717/peerj.16848)
Supplement: Supplemental Information 1 [file peerj-12-16848-s001.xlsx]

## Sheet: Sheet1
							IoC										BIS
number	gender	age	BMI（kg/m2）	ASA classification	Surgical type	operative time（min)	T0	T1	T2	T3	T4	T5	T6	T7	T8	T9	T0	T1	T2	T3	T4	T5	T6	T7	T8	T9
1	female	55	27.37	II	hysterectomy	134	91.4	66.8	52	48.4	53.3	51.7	53.2	46.5	53.6	45.5	88.9	58.4	49.6	47.7	55.4	57.4	49.4	54	50.9	51.4
2	female	64	24.26	II	hysterectomy	138.1	91.4	59.8	50.1	53.3	52	56.2	54.1	48.2	53.9	53.2	91.4	49.9	51.1	51.3	57.3	57	55	57.1	55.2	51.4
3	female	41	21.09	II	hysterectomy	83.1	84.3	67.6	45.5	45.1	54.3	55.2	55.5	53.4	49.5	51.9	93.2	54.6	56.1	53.4	59.9	59.3	56.1	53.2	50.9	57.9
4	female	57	23.21	II	hysterectomy	114.2	86.5	59.5	51.4	43	52.8	54	44.7	50.7	51.8	49.7	92.9	62.1	53.5	47.9	54.3	56.2	58.6	51.6	53.5	53.2
5	male	53	26.79	II	cholecystectomy	33.3	86.2	67.5	55.6	51.6	54.2	53.3	51.2	51.6	51.3	53	91	72	56.2	53.1	52.5	47.3	51.2	58.4	49.7	55.9
6	male	42	22.83	II	cholecystectomy	168.9	90.9	65.3	58.8	51.5	53.8	54.2	52.7	48.5	53.9	49.6	88.5	63.9	53	53.1	52.9	52.1	47.8	53.1	55	54.5
7	female	48	26.15	II	hysterectomy	95.5	93.7	60.3	49.8	50.4	53.9	61.9	53.7	50.1	49.7	54.3	92	61.8	62.4	49.3	53.5	56.1	57.9	54.8	55.4	58.1
8	male	54	24.78	I	cholecystectomy	71.7	89.1	56.5	44.9	51.9	53.7	53	48	51.3	55.4	52.1	90	57.7	46.4	47.7	54.2	55.4	53.7	51.7	52.3	55.8
9	female	67	26.92	II	cholecystectomy	111	92	55.4	52.3	54	57.8	49.5	48.9	50.5	57.3	47.2	94	60.9	51.2	52.5	57.3	60.4	49.4	54.4	54.5	50.7
10	female	65	21.38	II	hysterectomy	62.4	91.3	60	53.2	53.6	56.3	58	53.9	50.2	51.6	44.9	86.4	65	52.5	53.4	50.7	58.8	51.1	54.8	54.2	52.9
11	female	42	24.26	II	hysterectomy	120.7	87.2	59	50.7	48	55	54.8	51.4	51.3	52.4	51.1	90.6	59.1	53.1	52.9	56.4	56.1	50.4	53.7	56.4	55.8
12	female	66	22.61	I	hysterectomy	98.3	90.9	59.1	46.9	53	51.4	51.7	53.2	50	53.8	55.2	93.8	69.5	58.4	53.3	53.9	54.9	56.5	54.5	54.1	54.3
13	female	56	29.32	II	hysterectomy	211.6	88	67.3	60	50.7	51.1	59.7	49	55.8	55.7	52.4	88.9	54.5	53.6	48.5	58.6	50	54.7	56.6	56.1	59
14	female	51	25.93	II	hysterectomy	168.6	93.8	59.8	41.8	48.2	50.3	54.6	47.1	49.8	53.9	52	88.5	58.5	52.3	52.9	53.7	60.1	53.6	50.2	53.6	53.5
15	male	56	26.83	I	cholecystectomy	18.3	89.8	68.3	49.5	45.7	61	54	53.8	57.1	53.5	53.9	87.7	60.6	53	50	55.8	55	53.6	54.2	52.4	49.9
16	male	50	22.86	II	cholecystectomy	139.8	94.1	58.4	46.1	52.4	57.2	51.4	55	51.4	51.1	47.9	89.5	50.9	55.7	50	53.5	50	50.3	48.8	53.7	54.7
17	female	50	23.82	II	hysterectomy	63.7	88.8	67.3	49	48.8	55.5	50.7	56.3	48.6	51.8	56	89.7	63.1	50.1	47.6	54.1	55.9	56	53.7	53.4	51.5
18	female	61	24.14	II	hysterectomy	111	91.4	58.5	52.9	50.2	52.6	49	47.4	50.8	54.1	49.3	90.6	60.7	54.5	54.2	55.2	54.9	54	58.4	55.8	53.8
19	female	61	26.37	I	hysterectomy	128.3	89.7	62.6	52.2	47.2	52.2	52.3	47.9	54.8	57	52	87.8	60.7	46.7	51.9	55.3	52.9	52.1	56	53.7	56.2
20	male	61	24.13	II	cholecystectomy	152.5	84.7	67.3	48.7	44.5	56.2	50.7	47.5	55.1	54	50.8	90.5	64.2	52.5	53.9	54.5	56.1	52.3	53.7	51.9	54.4
21	female	56	25.72	II	hysterectomy	110.2	87.4	59.1	54.9	50.7	58.6	54.9	51.6	52.8	49.2	52.3	88.6	65.4	49.1	55.2	58.6	52.5	52.6	52.8	53.5	54.4
22	male	43	21.24	I	cholecystectomy	186.7	91.5	59	54.2	49.9	50.9	52.5	50	53.1	53.6	46.3	89.2	64.2	50.3	48.6	57.2	50.6	50.1	55	56.5	53.2
23	female	56	24	II	cholecystectomy	101.6	89.8	73.3	54.3	54.4	53.8	57.6	55.4	54	52.2	56.3	87.9	58.1	53.9	53	60.4	49.4	55.2	56.3	52.9	53.3
24	female	62	23.24	II	hysterectomy	135.1	87	67.2	49.9	53	54.7	57	47.6	48.6	51.8	53.4	89.5	60.1	48.4	51.4	55.1	53.5	57.2	53.7	52.4	53.4
25	male	55	22.01	I	cholecystectomy	149	88.3	59	56	53.9	50.2	53.7	46.8	50.9	51.9	57.6	100	62	49	53.7	58.5	52.7	60.6	57.6	56	47
26	female	58	25.41	II	hysterectomy	125.1	90.5	65.4	54.4	47.4	56.9	52.6	52.3	47.7	50.1	55.9	99.6	54.3	46.9	54.2	50.6	55.9	54.5	51.7	54	54.6
27	female	56	25.04	II	hysterectomy	158	87.4	59.4	62	46.7	53.9	56.1	55	51.2	51.6	51.9	93.4	55.3	44.2	53.5	57.4	50.1	50.3	48.8	53	56
28	female	49	24.63	I	hysterectomy	134.9	92.4	65.7	56	45.5	59.4	50.5	49.4	54.8	50.3	49.2	92.4	58.3	52.2	49.4	56.8	54	53.5	51.8	52.2	50.6
29	female	53	22.41	II	hysterectomy	89.1	88.3	69.9	56.4	51.9	54	54.9	48.1	54.2	51.5	46.9	86.7	60.7	57.3	51.1	54.9	50.1	49.7	53.2	50.5	50
30	female	46	26.42	I	hysterectomy	46.9	94.5	52.1	51.8	60.2	55.9	51.7	51.3	58.3	52.8	51.9	88.6	69	52.1	52.1	57.6	60	51	52.8	54.2	55.1
31	female	57	25.15	II	hysterectomy	198.4	87.1	67.6	46.3	52.7	52.2	52.3	47.1	52.8	52.9	52.5	88.5	64.2	51.9	59.3	58	54.3	50.8	51.6	53.1	50.1
32	female	43	24.09	II	hysterectomy	96.5	90.4	70.1	50.1	47.3	53.4	51.7	51.7	46.8	51.9	54.9	91.7	58.2	48.7	54.5	58.4	58.3	50.3	56.9	54.5	49.6
33	female	44	24.62	II	hysterectomy	125.8	86	61.8	48.5	53.1	52.1	54.7	54	56.7	52	49.2	91.6	57.3	58.9	57.2	56.9	56.1	54.1	49.7	50.6	55.5
34	male	46	24.15	II	cholecystectomy	144.8	88.1	71.8	49.3	46	55.8	51.4	52.3	55.7	52.5	54.2	90.5	67.7	51.8	52.5	57.3	57.3	49.4	52.5	56.8	52.1
35	female	40	21.73	II	hysterectomy	126.2	88.4	62.5	53.9	44.9	58	50.7	46.3	50.9	53.7	52.1	89.3	73.5	57.8	52	54.2	51.2	55	51.3	54.9	56.6
36	female	61	24.11	II	hysterectomy	84.1	90.9	54.3	49.3	52.7	53.5	54.6	50.2	53	55.9	49.7	87.7	61.1	54.2	53	53.1	58.3	55.4	52.5	50.3	50.6
37	male	53	23.22	I	cholecystectomy	102.2	92.3	48.6	47.9	47.3	55.9	52.3	50.8	54.4	54.1	54.1	90.3	58	51.8	50.1	55.2	58.9	56.1	52	56.2	52.2
38	female	46	22.98	II	hysterectomy	116.4	90.7	59.6	49.9	51.2	53.7	54.2	56.8	53.4	51.7	52.6	93.4	53.5	57	54.5	56.3	48.4	52.8	54.8	52.5	54.2
39	female	61	22.7	II	hysterectomy	182.7	89	65.8	51	55.2	55.1	52.4	54.3	54.2	54.1	51.2	91.4	65	56.6	51	58.2	54.1	54.8	51.1	54.5	54.9
40	female	40	23.71	I	hysterectomy	85.9	92	63.4	53.3	51.5	57.7	53.9	51.5	52.1	51.8	57.3	90.7	61.7	52.3	48	53.9	52.7	58.5	51.7	54.3	54.8
41	male	51	21.32	I	cholecystectomy	154	92	64	47.7	53.5	55.2	47	55.4	52.3	47.6	53.6	92	66	57.8	53.6	54.6	55.1	53.1	53.9	51.9	54.1
42	female	50	26.15	II	hysterectomy	134.3	90.2	58.2	52.9	44.3	52.4	54.4	48.7	52.6	46.1	51.6	91.8	56	59.7	47.6	63.2	52.1	52.3	56.3	47.4	53.1
43	female	53	25.43	II	hysterectomy	111.9	91.4	62.4	52	52.5	52.9	57.8	50.7	50.4	47.8	52.7	85.8	61.5	52.5	46.9	54.3	55.4	58.4	49.1	55	52.3
44	female	53	24.55	II	hysterectomy	77.8	91	51.9	57.1	57.8	54.5	55.8	55.6	56	51.8	52.1	90.3	57.2	51.8	52.2	60.6	56.4	45.1	58.1	53.1	54.8
45	male	45	24.52	II	cholecystectomy	109.8	87.4	57.1	50.7	52	54.4	55.5	55.9	52.4	50.8	52.4	89.1	66.5	54.3	49.1	58.2	55.3	51.5	51.5	52.5	52.7
46	female	51	23.28	II	hysterectomy	117.9	91.9	56.7	51.1	44.5	52.8	52.7	53.7	54.1	50.5	53.2	84.7	57.7	54.1	49.2	54.4	54.3	60.5	55.3	54.8	54.6
47	male	50	26.24	II	cholecystectomy	60.8	88.2	64.6	46.8	49.3	55.3	53.7	53.1	50.2	52.6	50.1	86.6	59.9	55.9	51	55.6	50.8	51.4	56.2	52.3	56.2
48	female	56	24.36	II	hysterectomy	129.5	88.4	61.5	45.9	48.3	57.9	53.9	50	49.6	50.7	49.6	89.4	58.7	51.8	50.2	55.3	54.8	51.1	56.9	55.3	48.3
49	male	59	23.42	II	cholecystectomy	87.5	90.4	54.7	52.9	51.5	54.3	53.5	53.8	52.1	50.7	52.9	92.5	65.1	55.5	50.9	57	53.1	49.1	52.4	54.2	57.9
50	female	59	26.78	II	hysterectomy	117.6	89.1	61.5	50.6	51.6	54.4	51.3	49.4	51.7	54.1	57.3	89.6	62.4	56.8	52.1	59.2	50.8	55.4	53.7	51.6	52.1
51	female	45	24.21	II	cholecystectomy	135.4	89.6	57.5	53.7	51.6	49.7	52.4	53.3	55.5	54.6	51	91	55.5	53.5	48.5	51.8	54.4	46.3	53.3	55.7	56.8
52	male	52	23.62	II	cholecystectomy	84.1	91.4	57.6	47.9	48.8	53.1	52.9	52.5	53.9	59.1	49	87.8	57.3	53.4	48.4	60.8	54	50.4	52.2	54.9	57.3
53	female	43	24.1	I	hysterectomy	109.6	92.6	66.6	59.6	47.9	51.6	52.1	54.9	53.8	53.3	51.2	84.3	55.3	47.9	46.2	57.8	55.2	54.7	54.3	56.6	50.1
54	female	44	23.2	I	hysterectomy	136	89.4	62.2	52.1	47.9	54	55.3	50.5	48.7	52.6	50.5	90.5	62.8	48.3	50.5	54.5	57.6	52.9	54.5	51.8	54.1
55	female	51	22.75	II	hysterectomy	45.6	90.7	63.9	56	53.2	56.1	59.5	53.5	49.9	50.9	50.9	87.6	61.9	47.1	53.1	55.5	56.3	54.8	52.8	51.8	61.9
56	female	62	28.7	II	hysterectomy	164.4	89.3	66.8	50.7	43.4	58.5	50.1	53.9	52.9	51.9	53.2	93.5	52.5	48	49.7	56.6	58.5	53.3	54	54.5	53.1
57	female	46	27.28	II	hysterectomy	221.8	90.5	62.6	51	49.3	59.1	53.6	49.2	51.5	52.3	51.5	95	51.1	52.2	52.7	56.6	52.4	55	60.2	55.3	54.8
58	female	54	25.08	II	hysterectomy	161.2	91	64.8	54.5	51.1	54.6	49.8	52.1	55.7	47.7	50.2	89.2	60.1	46.5	52.8	58.8	52	48.9	53.7	55.7	54.4
59	female	50	22.53	II	hysterectomy	108.5	88.3	65.6	53.9	47.7	54.1	56.5	56.2	55.8	51.7	50.6	93.5	63.7	61.4	53.9	58.5	54.3	53.6	55.4	53.8	56.7
60	female	59	23.17	II	hysterectomy	139.3	90.6	68.4	47	51.8	56.8	56.7	52	50.9	54.5	48.1	92.9	61.2	55.6	53.9	54.9	58.7	48	52.5	53.3	56.2
61	male	44	24.29	II	cholecystectomy	78.7	91.4	64.4	45.3	49.8	56	49.2	50.8	54.6	50.9	49.4	86.4	52.9	44.8	49.7	55.5	58.5	55.3	52.4	55.3	51.4
62	female	51	25.87	I	hysterectomy	199.2	90.1	69.9	47.1	46.7	56.7	58	53	56	53.8	47.8	90.1	52.9	48.3	49.3	57.6	54.2	51.9	52.8	58.2	52.6
63	female	55	22.41	II	hysterectomy	160.4	94.3	61.7	45.8	50.7	56.7	50.6	50.9	53.2	55.1	50.4	91	64.5	52.4	51.6	56.1	52.8	54.9	55.1	55.8	54.5
64	female	59	20.78	I	hysterectomy	154.1	88.4	61.3	51.9	49.1	51.4	53.8	52.9	56.6	55.4	48.8	91.7	59.6	46.2	49.8	58.6	50.1	51.2	51.7	54	53.5
65	female	62	22.22	II	hysterectomy	85.3	88	71.6	49.9	48.6	56.2	56	51.3	55.1	54.6	49.9	92.1	58.5	51	55	54.1	56.6	53.9	49.1	52.5	59.7
66	female	52	25.12	II	hysterectomy	134.8	85.4	58.5	50.1	47.5	54.7	53.6	51.6	52.9	46.3	51	92.1	66.7	57	54.9	57	54.7	56.2	53.8	54.9	54.7
67	female	41	25.22	II	hysterectomy	98.4	92.2	61.5	46	50.3	53.1	58.9	53	54.6	50.9	48.4	92.1	56.5	52.1	51.7	56.5	51.1	46.7	52.6	52.7	54.7
68	male	46	25.32	II	cholecystectomy	108.6	92.1	67	54.9	43.4	53.3	60	55.5	52.9	54.9	51.8	89.4	61	52.5	50.4	59.3	53.6	47.1	54.4	54.4	51.6
69	female	44	24.37	II	hysterectomy	98	89.7	62.4	53.5	48.6	57.9	53.6	52.9	51.3	53.5	52.9	91.3	62.4	48.9	52.7	52.5	49.2	47.2	53.9	55.6	50.5
70	female	67	24.88	II	hysterectomy	79.1	92.2	69.8	51.3	48.1	53	48.6	56.3	53.3	52.5	49.1	84.1	64.3	50.6	49.8	55.8	55.9	55.5	55.5	55.9	55.5
71	female	47	23.8	II	hysterectomy	83.9	90.4	67.6	55.9	46.8	52	52.4	46	52.5	53.6	55.1	87	56.2	47.6	51.1	56	54.1	54.2	55.9	55.1	53.2
72	female	56	25.99	II	hysterectomy	112.8	90.7	63.3	48	52.4	55.4	51.2	50.4	51.4	55.5	47.3	93.5	62.1	54.2	50.1	50	59.5	50.7	50.4	56.9	55.2
73	female	50	22.36	II	hysterectomy	51.3	90.2	57	53.4	47.4	59.6	51.4	52.3	56.9	52.9	50.8	88.4	73.6	51	51.7	58.9	50.6	57.6	49.9	57.9	51.7
74	male	57	25.32	II	cholecystectomy	146.7	91	64.9	53.1	52	55	50.5	49.3	52.9	50.4	47.6	91.1	53	55.8	54.2	62.8	57.5	53.3	54.9	49.6	55.8
75	female	46	23.2	II	hysterectomy	116.7	90.2	53.4	53.1	53.6	55.6	53.5	48.1	59.4	52	50.9	94.4	62.4	57.6	53.3	55.3	55	47.9	54.4	49.9	49.3
76	female	42	24.03	II	hysterectomy	150.4	97	63	48.6	49.5	52.7	58.4	53.4	51.6	51.9	48.1	87.8	59.2	56.9	54.3	56.5	54.9	49.7	51.4	51.8	57.4
77	female	42	25.48	II	hysterectomy	132.7	86.9	66.3	53	51.1	58.8	51.5	53.4	53.8	54.9	50.2	87.6	56.4	52.6	49.2	54.7	56.7	48.6	56.7	49.4	55.7
78	female	55	26.27	II	hysterectomy	142	85.2	62.8	49.5	52.4	55.2	52.6	52.5	56.4	53.6	49.8	88.9	56.3	50.8	51.9	56.8	58.2	55.9	53.8	53	53.9
79	female	50	22.76	I	hysterectomy	60.2	87	66.7	47.9	49.8	56.1	56.1	52.8	59.4	53.9	48.5	91.4	62.7	48.1	49	54.9	51.4	51	54	53.1	50.9
80	female	50	26.63	II	hysterectomy	79.3	87.1	73.6	46.6	52	52.6	56.2	49.2	53.2	52.9	46	89.7	71.5	53.2	52.4	55.6	58.5	49.2	54.3	54.4	52.7
81	female	61	25.66	I	hysterectomy	103	88.8	67	55.9	45.5	56.9	54.5	50.3	50.3	51.5	53.5	87.6	56.5	56.5	52.2	59.8	51	51.1	55.5	54.5	54.2
82	female	53	24.47	II	hysterectomy	126.1	89.5	63.1	48.1	54.1	55.8	55.8	51.4	54.4	52.6	57.6	85.9	62.9	51.5	54.7	53.7	51.4	50.3	57.4	52.3	56.5
83	female	53	24.26	II	hysterectomy	168.2	89.4	65.3	50.9	46.5	52.2	55.4	49.7	49	53	58.3	89.2	57.6	52.1	54.2	54.4	52.6	55.6	53	52	51.2
84	female	62	24.23	II	hysterectomy	109.5	91.3	64.1	46.6	43.4	55	52.4	52.6	51.7	48.6	50.5	89.6	69.9	55.2	53.1	55.6	56.8	54.4	49.4	55.6	56.7
85	female	46	24.09	II	hysterectomy	173.7	90.9	53.8	50.4	55.1	53.8	54.3	58.3	53.1	52.9	51.7	88.8	63	56.1	50.2	55.5	51.4	53.8	56.2	53	60.2
86	female	56	24.62	II	hysterectomy	141.2	91.8	59.1	38.2	49.9	55.1	52.6	50.3	56.2	55	50.5	89.5	59.7	47.3	50.3	59.4	55.6	54.2	51.4	50.8	52.5
87	male	57	24.66	I	cholecystectomy	170.1	94.5	68.8	47.1	51.7	54.3	51.1	53.5	56.1	52.2	52.1	87.2	63.3	53.6	46.4	60.9	55.8	53	56.7	53.8	54.8
88	female	50	25.93	II	hysterectomy	126.8	93	61.3	45.7	48.8	54.4	54.8	48.8	52.3	56.7	49.2	91.7	60.3	53.5	50.3	53.4	55.1	49.9	52.2	54.3	52.1
89	female	53	27.07	II	hysterectomy	94.4	86.6	65	47.4	46.4	52.5	53.5	55.4	54.8	54	46.4	84.3	65.7	52.2	47.6	54.2	56.3	54.6	57.3	52.9	49.6
90	female	43	25.34	II	hysterectomy	60.3	83.9	55.6	50.7	38.9	54.1	52.8	49	51.6	51.3	51.8	90.6	59.4	56.2	53.7	57.1	51.1	50.3	51.7	55.3	57.1
91	female	43	24.24	II	hysterectomy	128	92.2	61.9	50.3	52.4	56.7	54	52.3	54.1	52	48.4	92.1	54.9	51.4	53.7	54.9	57.6	49.5	50.9	54.3	55.3
92	female	52	25.6	II	hysterectomy	155.4	85.2	65.1	59.7	49	59	55.7	49.9	57.3	51.7	46.4	87.9	61.5	49.6	51.8	60.8	54.9	49.5	56	53.3	52.4
93	female	56	24.88	II	hysterectomy	109.4	90.1	53.5	49.3	49.4	52.2	54.2	53.1	52.8	53.1	58.7	90.1	67.9	53.8	50.5	59.9	56.8	55.6	50.3	53.7	53.9
94	female	63	22.9	II	hysterectomy	99.2	90	63.6	50.6	51.6	60.5	53.8	51.7	51.6	54.5	51.2	91	54.6	54.6	51.8	57.2	51.7	56	55.3	54.8	53.1
95	female	47	26.13	I	hysterectomy	108.8	95.6	60.5	45.1	44.9	58.5	54	51.6	51.1	51.7	53	88.6	59.2	51.9	55.4	57.2	54.8	47.4	54.7	52.8	50.2
96	female	53	25.08	II	hysterectomy	76.2	89.7	56	49.6	47.4	55.3	53.4	60	54.2	53.7	55.3	90.2	65.2	55.9	54.8	55	57.2	52.4	53.3	51.5	46.8
97	female	51	24.8	II	hysterectomy	101.1	88.6	61.3	46.1	54.2	54.2	51.4	49.9	55.8	57.2	47	91.4	51.1	46.9	50.3	57.7	57.6	53.7	52.8	53.5	53.5
98	female	39	25.42	II	hysterectomy	114.1	90.5	50.4	51.8	52.3	53.2	55.2	51.5	57.8	55	53.1	87.7	63.4	48.6	51.9	58.6	54.4	51	58.7	54.1	52.5
99	female	48	25.01	II	hysterectomy	123.4	90.5	49	55.2	45.4	56.9	56.7	59.2	52.5	54.7	53.3	92.5	64	40.9	48.7	56.2	49.1	55.3	52.8	55	52.3
100	female	39	23.05	II	cholecystectomy	118.9	90.1	54.6	53.3	42.1	53.3	52	48.5	52.8	50.2	52.1	93.2	61.4	54.8	52.4	60.6	51.4	53.7	53.2	53.8	51.6
101	female	57	24.32	II	hysterectomy	146.8	88.4	55.7	48.7	48	53.8	58	53.2	50.8	51	52.3	91.1	56.6	49	53.3	57.5	55.3	52.4	51.4	52.8	49.3
102	female	45	24.34	II	hysterectomy	126.1	86.8	54.6	44.9	50.9	57	52.9	48.7	56.5	53.1	50.4	90.3	60.3	51.8	53.7	55.6	57	51.2	51.7	55.1	52.4
103	female	52	23.71	II	hysterectomy	196.6	90.7	51.4	57.7	53.5	55.9	52.7	54.6	52.2	52.2	54	87	60.8	56.7	47.6	56.7	56	55	52.2	53.6	54
104	female	48	27.32	II	cholecystectomy	134.4	86.5	63.2	60.1	50.4	57	51.1	52.6	51.2	48	49.4	91.6	64.8	53	52.7	58.5	52.8	55.5	57.9	55.6	51.1
105	female	53	23.15	I	hysterectomy	196.2	87.3	52.2	52.1	46	56.1	51.4	53.5	58	48.3	49.6	86.9	63.5	51.1	49.3	54.8	61.3	54.4	52.7	53.6	54.7
106	female	47	23.79	II	hysterectomy	91.6	93.3	62.2	47.5	51.2	53.9	51	50.9	54.5	55.2	54	94.6	58.7	49.5	50.5	55.6	54.8	52.1	52	53.8	53
107	female	55	23.42	II	hysterectomy	143.3	88.8	66.2	56.6	45.8	53.7	54.2	52.4	54.2	50.4	56.7	91.7	68.1	51.9	53.4	61.7	57.2	55.8	52.6	53.6	53.4
108	female	56	22.67	II	hysterectomy	110.8	89.6	61.5	49.2	46.6	56.8	57.2	55.8	49.8	58.1	50.8	91	60.1	55.1	52.2	54.7	53.4	50.1	55.4	51.8	50.2
